# Supplementary material
Source: PubMed Central journal article supplement (PMC9511630)
Supplement: NEJMc2209371_disclosures.pdf [file NEJMc2209371_disclosures.pdf]

Disclosure Purpose: 22-09371

## Summary of Interests

### Company or Organization

| Entity                                                                                                     | Type             | Interest Held By                                                                |
|------------------------------------------------------------------------------------------------------------|------------------|---------------------------------------------------------------------------------|
| National Institute of Health                                                                               | Grant / Contract | Self                                                                            |
| <i>Recipient Name:</i> Yu Gu<br><i>Grant / Contract Description:</i> R01<br><i>Additional Information:</i> |                  | <i>Recipient Type:</i> Institution<br><i>Grant / Contract Purpose:</i> Research |

## Additional Questions:

- Are there other relationships or activities that readers could perceive to have influenced, or that give the appearance of potentially influencing, what you wrote in the submitted work?**  
No.
- What is the manuscript title?**  
Protection of Vaccination and Prior Infection Against Omicron in Children
- Are you the corresponding author?**  
No.

## Certification

I certify that the information provided in this disclosure is complete and accurate.

**Disclosure Purpose:** 22-09371

### Summary of Interests

I do not have any interests to disclose at this time.

### Additional Questions:

1. **Are there other relationships or activities that readers could perceive to have influenced, or that give the appearance of potentially influencing, what you wrote in the submitted work?**  
No.
2. **What is the manuscript title?**  
Protection of Vaccination and Prior Infection Against Omicron in Children
3. **Are you the corresponding author?**  
Yes.
  - a. **Please list the other authors' names here.**  
Yu Gu Yangjianchen Xu Donglin Zeng Bradford Wheeler Hayley Young Shadia Khan Sunny Zack Moore

### Certification

I certify that the information provided in this disclosure is complete and accurate.

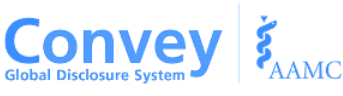

**Disclosure Purpose:** 22-09371

### Summary of Interests

I do not have any interests to disclose at this time.

### Additional Questions:

- Are there other relationships or activities that readers could perceive to have influenced, or that give the appearance of potentially influencing, what you wrote in the submitted work?**  
No.
- What is the manuscript title?**  
Protection of Vaccination and Prior Infection Against Omicron in Children
- Are you the corresponding author?**  
No.

### Certification

I certify that the information provided in this disclosure is complete and accurate.

**Disclosure Purpose:** 22-09371

### Summary of Interests

I do not have any interests to disclose at this time.

### Additional Questions:

- Are there other relationships or activities that readers could perceive to have influenced, or that give the appearance of potentially influencing, what you wrote in the submitted work?**  
No.
- What is the manuscript title?**  
Protection of Vaccination and Prior Infection Against Omicron in Children
- Are you the corresponding author?**  
No.

### Certification

I certify that the information provided in this disclosure is complete and accurate.

**Disclosure Purpose:** 22-09371

### Summary of Interests

I do not have any interests to disclose at this time.

### Additional Questions:

- Are there other relationships or activities that readers could perceive to have influenced, or that give the appearance of potentially influencing, what you wrote in the submitted work?**  
No.
- What is the manuscript title?**  
Protection of Vaccination and Prior Infection Against Omicron in Children
- Are you the corresponding author?**  
No.

### Certification

I certify that the information provided in this disclosure is complete and accurate.

**Disclosure Purpose:** 22-09371

### Summary of Interests

I do not have any interests to disclose at this time.

### Additional Questions:

- Are there other relationships or activities that readers could perceive to have influenced, or that give the appearance of potentially influencing, what you wrote in the submitted work?**  
No.
- What is the manuscript title?**  
Protection of Vaccination and Prior Infection Against Omicron in Children
- Are you the corresponding author?**  
No.

### Certification

I certify that the information provided in this disclosure is complete and accurate.

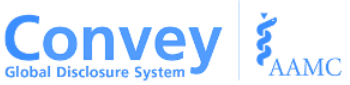

**Disclosure Purpose:** 22-09371

### Summary of Interests

I do not have any interests to disclose at this time.

### Additional Questions:

- Are there other relationships or activities that readers could perceive to have influenced, or that give the appearance of potentially influencing, what you wrote in the submitted work?**  
No.
- What is the manuscript title?**  
Protection of Vaccination and Prior Infection Against Omicron in Children
- Are you the corresponding author?**  
No.

### Certification

I certify that the information provided in this disclosure is complete and accurate.

**Disclosure Purpose:** 22-09371

## Summary of Interests

| Company or Organization                                                                                                                                                      |                  |                                                                                |
|------------------------------------------------------------------------------------------------------------------------------------------------------------------------------|------------------|--------------------------------------------------------------------------------|
| Entity                                                                                                                                                                       | Type             | Interest Held By                                                               |
| <a href="#">Foundation for the National Institutes of Health</a>                                                                                                             | Grant / Contract | Self                                                                           |
| <i>Recipient Name:</i> Donglin Zeng<br><i>Grant / Contract Description:</i> The research is partially supported by NIH grant R01-GM124104.<br><i>Additional Information:</i> |                  | <i>Recipient Type:</i> Individual<br><i>Grant / Contract Purpose:</i> Research |

## Additional Questions:

- Are there other relationships or activities that readers could perceive to have influenced, or that give the appearance of potentially influencing, what you wrote in the submitted work?**  
No.
- What is the manuscript title?**  
Protection of Vaccination and Prior Infection Against Omicron in Children
- Are you the corresponding author?**  
No.

## Certification

I certify that the information provided in this disclosure is complete and accurate.
